## **FACTORS IMPACTED ON WELLBEING IN ADOLESCENT WHO HAVE FAMILY MEMBER WITH MENTAL DISORDER: A LITERATURE REVIEW**

Rr Dian Tristiana\*, Glorino Rumambo Pandin, Ah Yusuf, Moses

\*The doctoral program, Faculty of Nursing, Universitas Airlangga

[diantristiana@fkn.unair.ac.id](mailto:diantristiana@fkn.unair.ac.id)

### **ABSTRACT**

Having a family member with mental disorder will affect their healthy family member life. This study to examine the factors impacted on adolescent well-being who have family member with mental disorder. This study was a literature review in two databases SCOPUS and Science which conducted by four steps: (1) identification of literature; (2) screening questions; (3) eligibility using inclusion criteria; and (4) assessment of the quality of the studies. This study found 17 article which then reviewed and analyzed. The study result found seven theme that impacted on well-being included the caregiving responsibilities; the caregiving perception; the caregiving supports; Coping; Caregiving burden; Caregiving positive effects; Psychological impact; Adaptation enhancing. This study the results show the need to explore the seven themes in relation to the conditions of well-being on adolescent who have family member with mental disorder.

**Keyword: adolescent; adolescent carers; caregiver; mental disorder**

## INTRODUCTION

Having a family member with chronic illness will affect their healthy family member life. A study found that one of five children has a parent with mental illness (Reedtz et al., 2018). Children with sibling experiencing mental disorder also have significant adverse effects on the health and well-being of other child (Krzczkowski et al., 2022). Those children are at high risk for developing mental illness.

Indonesian Basic Health Survey (RISKESDAS) 2018 found that more than 19 million population aged more than 15 experience mental emotional disorders, and more than 12 million people aged over 15 experience depression (Biro Komunikasi dan Pelayanan Masyarakat, 2021). There are various factors which increase the likelihood that children will show disturbance over time. Those factors include being raised in poverty, marital conflict, teen and single parenthood, parental depression, and hostile/angry parenting. Disruption in family structure can lead to several adverse events impacting both the mental health of children and their parents (Behere et al., 2017). Family condition affect the psychological condition in children.

Healthy child development comprises social and emotional wellbeing (some references referred to as non-cognitive skills, subjective wellbeing or character traits), not only simply absence of mental ill-health but the flourishing of positive mental traits (Gregory et al., 2021). Wellbeing and mental health are fundamental rights of children and adolescents vital for sustainable development. Childhood and adolescence are critical developmental periods to foster psychological wellbeing and reduce risk for mental disorders. Disruptions to mental health and wellbeing in childhood and adolescence are correlated with a range of adverse outcomes,

Parent's mental illness, instead of sensitive, often lead to what has been referred to as avoidant, anxious or insecure/disorganized attachment, which in turn, have been linked to a variety of adverse outcomes (Maybery et al., 2005). Familial stress also has been implicated as a significant predictor of child risk among children of parents with serious mental disorders, even after accounting for parental psychiatric symptomatology and functioning (Tebes et al., 2005). As parental mental health problems are thought to impact negatively on parent-child attachment (Erwin, 1998; Rutter, 1986) it is, therefore, extremely important to examine the factors impacted on adolescent child well-being who have family member with mental disorder.

## METHOD

This review followed the standard Preferred Reporting Items for Systematic Reviews and Meta-Analyses (PRISMA), namely: (1) identification of literature; (2) screening questions; (3) eligibility using inclusion criteria; and (4) assessment of the quality of the studies, which are discussed in the following sections.

### Identification

We searched the literature published until between November 2012 to November 2022 to identify relevant literature, in electronic databases Science Direct, and Scopus, using the following keywords:

| Database       | Keyword                                                                                                                                                                                                                                                                                                                                                                                                                                                                                                                                                                                                                                                                                                                                                                                                                                                                                                   | Result |
|----------------|-----------------------------------------------------------------------------------------------------------------------------------------------------------------------------------------------------------------------------------------------------------------------------------------------------------------------------------------------------------------------------------------------------------------------------------------------------------------------------------------------------------------------------------------------------------------------------------------------------------------------------------------------------------------------------------------------------------------------------------------------------------------------------------------------------------------------------------------------------------------------------------------------------------|--------|
| Scopus         | (( TITLE-ABS-KEY ( <i>physical</i> AND <i>health</i> )) OR ( TITLE-ABS-KEY ( <i>social</i> AND <i>well-being</i> )) OR ( TITLE-ABS-KEY ( <i>psychological</i> AND <i>well-being</i> )) AND (( TITLE-ABS-KEY ( <i>mental</i> AND <i>health</i> )) OR ( TITLE-ABS-KEY ( <i>mental</i> AND <i>disorder</i> )) OR ( TITLE-ABS-KEY ( <i>depression</i> )) OR ( TITLE-ABS-KEY ( <i>psychiatry</i> )) AND (( TITLE-ABS-KEY ( <i>young</i> AND <i>caregiver</i> )) OR ( TITLE-ABS-KEY ( <i>young</i> AND <i>carer</i> )) OR ( TITLE-ABS-KEY ( <i>young</i> AND <i>caregiver</i> )) OR ( TITLE-ABS-KEY ( <i>caregiving</i> AND <i>youth</i> )) OR ( TITLE-ABS-KEY ( <i>young</i> AND <i>adult</i> AND <i>carer</i> )) OR ( TITLE-ABS-KEY ( <i>young</i> AND <i>adult</i> AND <i>caregiver</i> )) OR ( TITLE-ABS-KEY ( <i>child</i> AND <i>carer</i> )) OR ( TITLE-ABS-KEY ( <i>child</i> AND <i>caregiver</i> )))) | 3,102  |
| Science direct | youth carer OR teenager OR adolescent AND well being OR physical OR psychological AND mental illness OR mental disorder OR depression                                                                                                                                                                                                                                                                                                                                                                                                                                                                                                                                                                                                                                                                                                                                                                     | 39,249 |

### Screening questions

The electronic database search obtained Scopus 3,102 and Science direct 39,249. The double which then screened for the title and abstract, 398 studies were included in the review. Then from the selected articles were screened with the following questions:

1. Were children or teenager or adolescent as carer or caregiver for their parents, sibling or family member with mental illness or mental disorder is included as a general study population? (y/n)
2. Were any kind of social, physical and mental health problems part of the study? (y/n)

Based on the results of the screening questions, 398 studies were first included in the review. Studies were excluded because of limited relevance to children or teenager or adolescent as carers or caregiver for their parents, sibling or family member with mental illness or mental disorder which described the social, physical and psychological aspects of young carers.

### **Eligibility using inclusion criteria**

The following inclusion criteria were then applied:

Does the study detail the direction on children or teenager or adolescent as carers or caregiver for their parents, sibling or family member with mental illness or mental disorder which described the social, physical and psychological aspects of young carers (+/-/0)?

Among the identified articles, 381 failed to meet the eligibility criteria, hence 17 articles were included in the review (Table 1).

## **RESULT**

This review identified within the included studies

### ***The caregiving responsibilities***

This review found that caregiving responsibilities is divided into domestic care or personal tasks (Janes et al., 2022) and caring role (Casu et al., 2021) such personal care (Kallander, Weimand, Becker, et al., 2018) and assisted with activities of daily living (ADLs) and instrumental ADLs (Iezzoni et al., 2016); emotional task (Janes et al., 2022); employment, financial and practical management (Janes et al., 2022; Kallander, Weimand, Becker, et al., 2018), household management and level of caregiving (*appropriateness of responsibilities and time spent caring*) (Janes et al., 2022).

### ***The caregiving perception***

The adolescent child views the caregiving activities as identity. This identity is perceived the adolescent child as: *duty*; *Assignment*; the young person perceives their caring as a positive part of who they are (Janes et al., 2022); perceived helplessness (Wepf et al., 2021) and viewed

caregiving as just part of their daily reality (i.e., simply needing to be done) (Iezzoni et al., 2016).

### ***The caregiving supports***

The adolescent child found feeling of support or unsupported from: stigma; social recognition; and the presence of understanding friends (Janes et al., 2022).

### ***Coping***

Subjective coping (Wepf et al., 2021)

### ***Caregiving burden***

The adolescent child harboring a sense that the help they were providing was too much for them (Hamill, 2021); involved 10–29 h of care per week; a “high” level of caregiver burden; sleep disturbance and greater sleep latency in the prior 30-day period (Hoyt et al., 2021), and unpredictable behaviour or experiencing parental withdrawal from many aspects of daily living (McGibbon et al., 2019).

### ***Caregiving positive effects***

Young caregivers’ sense of pride in providing help and feeling good about what they were able to provide for their grandparents and parents. Both factors demonstrated good reliability and were related to other variables in predictable ways. For example, participants who reported greater provision of assistance with ADLs reported greater *Burden*. Alternately, participants who reported deriving greater *Meaning* from their experiences, also displayed greater empathy, higher self-esteem, and greater commitment to collectivism (Hamill, 2021); Roughly half recalled as children feeling proud, special, or otherwise positively toward caregiving activities (Iezzoni et al., 2016); Learning self-compassion; Functions of self-compassion; Lessons in self-criticism; and Self-compassion for the “kid in the background” (Dunkley-Smith et al., 2021) and greater social support (Rigby et al., 2019)

### ***Psychological impact***

The caregiving activities caused a significant negative influence on emotional well-being (Li et al., 2021); psychological stress, feeling overwhelmed, and harboring a sense that the help they were providing was too much for them (Hamill, 2021); lower quality of life; more caregiver burden (Rigby et al., 2019); (Kallander, Weimand, Ruud, et al., 2018); negative outcomes at a clinical level of concern (Iezzoni et al., 2016); feeling resentful, primarily from time demands, insufficient appreciation, and being different from their peers; poorer mental health (King et al., 2021; Tianhang et al., 2021(Collishaw et al., 2015)).

## ***Adaptation enhancing***

The review found that some condition enhanced adolescent child adaptation that could increase their wellbeing, includes: knowledge and response to both the nature and trajectory of illness or disability (McGibbon et al., 2019); various caring activities, especially with regard to personal care; social skills (Kallander, Weimand, Becker, et al., 2018); perceived external locus of control (Kallander, Weimand, Ruud, et al., 2018); gender and cultural factors (Iezzoni et al., 2016); education about parental mental health (Grové et al., 2015) and Co-parent emotional support (Collishaw et al., 2015).

## **DISCUSSION**

Caregiving task and responsibilities is related with caregiving demands of caregiver. provide the bulk of assistance with daily activities to adults living with cognitive disabilities. Providing care are seen as the primary stressor, which may trigger secondary stressors such as time conflicts between caregiving and other demands, or strained relationships between caregiver and recipient. This caregiving demand could lead to stress which affect the caregiver well-being.

The caregiving demand is viewed as positive or negative based on the caregiving perception. Identity may be detrimental to well-being when person perceive they are not satisfactorily fulfilling the expectations associated with that identity. Being a caregiver can represent a source of purpose and self-esteem (Rurka et al., 2021). Adult children are able to derive a sense of purpose and meaning from their caregiver identity relies on whether they perceive that they are satisfying the expectations that they have for themselves as a caregiver.

stigma towards mental health in the society is a burden for caregivers when taking care of mentally ill patients (Venkatesh et al., 2016). The caregivers might perceive themselves as being secluded from the society because of limitations on social and leisure activities as well as social stigma and discrimination. perceived social support may be a good predictor of subjective burden (del-Pino-Casado et al., 2018).

Caregiving burden is the level of multifaceted strain perceived by the caregiver from caring for a family member and/or loved one over time (Liu et al., 2020). Prior study found that Burden was affected directly by behavioral problems, frequency of getting a break, self-esteem, and informal hours of care and was not affected by perceived social support (Chappell & Colin Reid, 2002). This study found that caregiving burden involved the hour spent for care, sense providing help, family withdrawal from daily living activity.

Even though caring for family members creates a burden on caregivers, the results of the review also found positive aspects felt by caregivers of adolescents which can reduce the perceived parenting burden. These positive aspects are in the form of pride, meaning giving caregiving, self-compassion and feeling of getting greater social support from others.

The psychological impact felt by caregivers is in the form of decreased emotional well-being, psychological stress, feeling overwhelmed, feeling restless, primarily from time demands, insufficient appreciation, and being different from their peers; poorer mental health.

Several things can encourage adaptation in caregivers, namely knowledge and response to both the nature and trajectory of illness; social skills; perceived external locus of control; gender and cultural factors; education about parental mental health; and Co-parent emotional support.

## REFERENCES

- Behere, A. P., Basnet, P., & Campbell, P. (2017). Effects of Family Structure on Mental Health of Children: A Preliminary Study. *Indian Journal of Psychological Medicine*, 39(4), 457. <https://doi.org/10.4103/0253-7176.211767>
- Biro Komunikasi dan Pelayanan Masyarakat, K. K. R. (2021). Kemenkes Beberkan Masalah Permasalahan Kesehatan Jiwa di Indonesia. *Kementerian Kesehatan*. <https://sehatnegeriku.kemkes.go.id/baca/rilis-media/20211007/1338675/kemenkes-beberkan-masalah-permasalahan-kesehatan-jiwa-di-indonesia/>
- Casu, G., Hlebec, V., Boccaletti, L., Bolko, I., Manattini, A., & Hanson, E. (2021). Promoting Mental Health and Well-Being among Adolescent Young Carers in Europe: A Randomized Controlled Trial Protocol. *International Journal of Environmental Research and Public Health* 2021, Vol. 18, Page 2045, 18(4), 2045. <https://doi.org/10.3390/IJERPH18042045>
- Chappell, N. L., & Colin Reid, R. (2002). Burden and well-being among caregivers: Examining the distinction. *Gerontologist*, 42(6), 772–780. <https://doi.org/10.1093/GERONT/42.6.772>
- Collishaw, S., Hammerton, G., Mahedy, L., Sellers, R., Owen, M. J., Craddock, N., Thapar, A. K., Harold, G. T., Rice, F., & Thapar, A. (2015). Mental health resilience in the adolescent offspring of parents with depression: a prospective longitudinal study. *The Lancet Psychiatry*, 3(1), 49–57. [https://doi.org/https://doi.org/10.1016/S2215-0366\(15\)00358-2](https://doi.org/https://doi.org/10.1016/S2215-0366(15)00358-2)
- del-Pino-Casado, R., Frías-Osuna, A., Palomino-Moral, P. A., Ruzafa-Martínez, M., & Ramos-Morcillo, A. J. (2018). Social support and subjective burden in caregivers of adults and older adults: A meta-analysis. *PLOS ONE*, 13(1), e0189874. <https://doi.org/10.1371/JOURNAL.PONE.0189874>
- Dunkley-Smith, A. J., Reupert, A. E., Ling, M., & Sheen, J. A. (2021). Experiences and perspectives of self-compassion from young adult children of parents with mental illness. *Journal of Adolescence*, 89, 183–193. <https://doi.org/10.1016/J.ADOLESCENCE.2021.05.001>
- Gregory, T., Sincovich, A., Brushe, M., Finlay-Jones, A., Collier, L. R., Grace, B., Sechague Monroy, N., & Brinkman, S. A. (2021). Basic epidemiology of wellbeing among children and adolescents: A cross-sectional population level study. *SSM - Population Health*, 15, 2352–8273. <https://doi.org/10.1016/J.SSMPH.2021.100907>
- Grové, C., Reupert, A., & Maybery, D. (2015). Peer connections as an intervention with children of families where a parent has a mental illness: Moving towards an understanding of the processes of change. *Children and Youth Services Review*, 48, 177–185.



<https://doi.org/10.1016/J.CHILDYOUTH.2014.12.014>

Hamill, S. B. (2021). Assessing Young Caregivers' Feelings About Helping: Pilot Test of a New Scale. *Child and Adolescent Social Work Journal*, 38(5), 571–582.

<https://doi.org/10.1007/S10560-021-00792-7/TABLES/3>

Hoyt, M. A., Mazza, M. C., Ahmad, Z., Darabos, K., & Applebaum, A. J. (2021). Sleep Quality in Young Adult Informal Caregivers: Understanding Psychological and Biological Processes. *International Journal of Behavioral Medicine*, 28(1), 6–13.

<https://doi.org/10.1007/S12529-019-09842-Y/FIGURES/1>

Iezzoni, L. I., Wint, A. J., Kuhlthau, K. A., & Boudreau, A. A. (2016). Adults' recollections and perceptions of childhood caregiving to a parent with significant physical disability.

*Disability and Health Journal*, 9(2), 208–217. <https://doi.org/10.1016/J.DHJO.2015.10.009>

Janes, E., Forrester, D., Reed, H., & Melendez-Torres, G. J. (2022). Young carers, mental health and psychosocial wellbeing: A realist synthesis. *Child: Care, Health and Development*, 48(2), 190–202. <https://doi.org/10.1111/CCH.12924>

Kallander, E. K., Weimand, B. M., Becker, S., Van Roy, B., Hanssen-Bauer, K., Stavnes, K., Faugli, A., Kufås, E., & Ruud, T. (2018). Children with ill parents: extent and nature of caring activities. *Scandinavian Journal of Caring Sciences*, 32(2), 793–804.

<https://doi.org/10.1111/SCS.12510>

Kallander, E. K., Weimand, B., Ruud, T., Becker, S., Van Roy, B., & Hanssen-Bauer, K. (2018). Outcomes for children who care for a parent with a severe illness or substance abuse.

*https://doi.org/10.1080/0145935X.2018.1491302*, 39(4), 228–249.

<https://doi.org/10.1080/0145935X.2018.1491302>

King, T., Singh, A., & Disney, G. (2021). Associations between young informal caring and mental health: a prospective observational study using augmented inverse probability weighting. *The Lancet Regional Health - Western Pacific*, 15, 100257.

<https://doi.org/10.1016/J.LANWPC.2021.100257>

Krzeczowski, J. E., Wade, T. J., Andrade, B. F., Browne, D., Yalcinoz-Ucan, B., Riazi, N. A., Yates, E., Tagalakis, A., & Patte, K. A. (2022). Examining the mental health of siblings of children with a mental disorder: A scoping review protocol. *PLOS ONE*, 17(9), e0274135.

<https://doi.org/10.1371/JOURNAL.PONE.0274135>

Landi, G., Boccolini, G., Giovagnoli, S., Pakenham, K. I., Grandi, S., & Tossani, E. (2020). Validation of the Italian Young Carer of Parents Inventory-Revised (YCOPI-R).

*https://doi.org/10.1080/09638288.2020.1780478*, 44(5), 795–806.

<https://doi.org/10.1080/09638288.2020.1780478>

Li, S., Na, J., Mu, H., Li, Y., Liu, L., Zhang, R., Sun, J., Li, Y., Sun, W., Pan, G., & Yan, L. (2021). Combined Effects of Mother's, Father's and Teacher's Psychological Distress on Schoolchildren's Mental Health Symptoms.

*Neuropsychiatric Disease and Treatment*, 17, 1735–1743.

<https://doi.org/10.2147/NDT.S302782>

Liu, Z., Heffernan, C., & Tan, J. (2020). Caregiver burden: A concept analysis. *International*



- Journal of Nursing Sciences*, 7(4), 438. <https://doi.org/10.1016/J.IJNSS.2020.07.012>
- Maybery, D., Ling, L., Szakacs, E., & Reupert, A. (2005). Children of a parent with a mental illness: perspectives on need. *Australian E-Journal for the Advancement of Mental Health*, 4(2), 78–88. <https://doi.org/10.5172/JAMH.4.2.78>
- McGibbon, M., Spratt, T., & Davidson, G. (2019). Young Carers in Northern Ireland: Perceptions of and Responses to Illness and Disability within the Family. *The British Journal of Social Work*, 49(5), 1162–1179. <https://doi.org/10.1093/BJSW/BCY102>
- Reedtz, C., Lauritzen, C., Stover, Y. V., Freili, J. L., & Rognmo, K. (2018). Identification of Children of Parents With Mental Illness: A Necessity to Provide Relevant Support. *Frontiers in Psychiatry*, 9(JAN). <https://doi.org/10.3389/FPSYT.2018.00728>
- Rigby, T., Ashwill, R. T., Johnson, D. K., & Galvin, J. E. (2019). Differences in the Experience of Caregiving Between Spouse and Adult Child Caregivers in Dementia With Lewy Bodies. *Innovation in Aging*, 3(3), 1–15. <https://doi.org/10.1093/GERONI/IGZ027>
- Rurka, M., Jill Suitor, J., & Gilligan, M. (2021). The Caregiver Identity in Context: Consequences of Identity Threat From Siblings. *The Journals of Gerontology: Series B*, 76(8), 1593–1604. <https://doi.org/10.1093/GERONB/GBAA099>
- Tebes, J. K., Connell, C. M., Ross, E., & Kaufman, J. S. (2005). Convergence of sibling risk among children of parents with serious mental disorders. *Journal of Child and Family Studies*, 14(1), 29–41. <https://doi.org/10.1007/S10826-005-1111-2>
- Tianhang, Z., Chen, W., Liu, X., Wu, T., Wen, L., Yang, X., Hou, Z., Chen, B., Zhang, T., Zhang, C., Xie, C., Zhou, X., Wang, L., Hua, J., Tang, Q., Zhao, M., Hong, X., Liu, W., Du, C., ... Yu, X. (2021). Children of parents with mental illness in the COVID-19 pandemic: A cross-sectional survey in China. *Asian Journal Psychiatry*, 10.1016/j. <https://doi.org/10.1016/j.ajp.2021.102801>
- Venkatesh, B. T., Andrews, T., Parsekar, S. S., Singh, M. M., & Menon, N. (2016). Stigma and mental health- caregivers’ perspective: A qualitative analysis. *Clinical Epidemiology and Global Health*, 4(1), 23–27. <https://doi.org/10.1016/j.cegh.2015.06.003>
- Wepf, H., Joseph, S., & Leu, A. (2021). Pathways to Mental Well-Being in Young Carers: The Role of Benefit Finding, Coping, Helplessness, and Caring Tasks. *Journal of Youth and Adolescence*, 50(9), 1911–1924. <https://doi.org/10.1007/S10964-021-01478-0/TABLES/6>

Table 1 reviewed articles

| Article's title                                                                                                                        | Method                                                                                              | Finding                                                                                                                                                                                                                                                                                                                                                                                                                                                                                                                                                                                                                                                                                                                                                                                                                                                                                                                                                                   |
|----------------------------------------------------------------------------------------------------------------------------------------|-----------------------------------------------------------------------------------------------------|---------------------------------------------------------------------------------------------------------------------------------------------------------------------------------------------------------------------------------------------------------------------------------------------------------------------------------------------------------------------------------------------------------------------------------------------------------------------------------------------------------------------------------------------------------------------------------------------------------------------------------------------------------------------------------------------------------------------------------------------------------------------------------------------------------------------------------------------------------------------------------------------------------------------------------------------------------------------------|
| Young carers, mental health and psychosocial wellbeing: A realist synthesis (Janes et al., 2022)                                       | realist synthesis<br>All participants are children/young people between the ages of 4 and 18 years  | This study found that there are three domains interact each other: caregiving responsibilities, identity and support.<br>The caregiving responsibilities contains: domestic, emotional or personal tasks; employment and financial need; family size; level of caregiving ( <i>appropriateness of responsibilities and time spent caring</i> ).<br>Identity domain: <i>duty; Assignment</i> ; whether the young person perceives their caring as a positive part of who they are<br>Support domain: <i>stigma; social recognition</i> ; The presence of <i>understanding friends</i> .<br>The identity domain moderates the caregiving responsibilities domain through the potential development of a caregiving identity that mitigates the negative effects of caring and enables positive benefits.                                                                                                                                                                    |
| Pathways to Mental Well-Being in Young Carers: The Role of Benefit Finding, Coping, Helplessness, and Caring Tasks (Wepf et al., 2021) | 2525 adolescents (ranging from 15 to 21 years) recruited through different educational institutions | The young carers sample had a mean age of 17.87 years.<br>the direct association between benefit finding and mental well-being as well as the indirect association through subjective coping and perceived helplessness were statistically significant.<br>benefit finding in prior research may rather be understood as a way of coping with ongoing difficulties, namely the caring context.<br>The predicted indirect association of benefit finding and mental well-being through coping and helplessness was statistically significant among young carers providing exceptional levels of social/emotional support.<br>the burden due to instrumental tasks may overwhelm young carers in the sense that the requirements exceed their resources (e.g., energy, time, knowledge, skills), even if they generally feel positive about their ways of coping with challenges.<br>Benefit finding in terms of perceived inner strengths (dimension growth) solely showed |

| Article's title                                                                                                                            | Method                                                                                                                                                                                                | Finding                                                                                                                                                                                                                                                                                                                                                                                                                                                                                                                                                                                                                                                                                                                                                                                                                                                                                                                                                                                                                                                                             |
|--------------------------------------------------------------------------------------------------------------------------------------------|-------------------------------------------------------------------------------------------------------------------------------------------------------------------------------------------------------|-------------------------------------------------------------------------------------------------------------------------------------------------------------------------------------------------------------------------------------------------------------------------------------------------------------------------------------------------------------------------------------------------------------------------------------------------------------------------------------------------------------------------------------------------------------------------------------------------------------------------------------------------------------------------------------------------------------------------------------------------------------------------------------------------------------------------------------------------------------------------------------------------------------------------------------------------------------------------------------------------------------------------------------------------------------------------------------|
|                                                                                                                                            |                                                                                                                                                                                                       | associations of positive valence with mental well-being. Perceived benefits in terms of stronger empathy towards others (dimension empathy; e.g., sensitivity toward others' needs, caring about others, compassionate), however, only showed a positive association with mental well-being in the form of a direct path on mental well-being. The indirect paths were solely negative, as there was an indirect association over perceived helplessness, but no association over subjective coping                                                                                                                                                                                                                                                                                                                                                                                                                                                                                                                                                                                 |
| Assessing Young Caregivers' Feelings About Helping: Pilot Test of a New Scale (Hamill, 2021)                                               | Four hundred forty-three high school freshmen participated in this survey study focused on their prosocial behaviors                                                                                  | three factors that capture different aspects of young caregivers' feelings about the help they provide: <i>Burden</i> , <i>Meaning</i> , and <i>Negative Physiological Reactions</i> . Items from the first factor suggested a sense of caregiver <i>Burden</i> in these young people. They reported psychological stress, feeling overwhelmed, and harboring a sense that the help they were providing was too much for them. The second factor, <i>Meaning</i> , consisted of the positive scale items that captured young caregivers' sense of pride in providing help and feeling good about what they were able to provide for their grandparents and parents. Both factors demonstrated good reliability and were related to other variables in predictable ways. For example, participants who reported greater provision of assistance with ADLs reported greater <i>Burden</i> . Alternately, participants who reported deriving greater <i>Meaning</i> from their experiences, also displayed greater empathy, higher self-esteem, and greater commitment to collectivism |
| Promoting Mental Health and Well-Being among Adolescent Young Carers in Europe: A Randomized Controlled Trial Protocol (Casu et al., 2021) | the study protocol of an international randomized controlled trial (RCT) of an innovative group intervention designed to promote the mental health and well-being of adolescent YCs (AYCs) aged 15–17 | AYCs tend to face significant adversity in their personal and social lives related to their caring role                                                                                                                                                                                                                                                                                                                                                                                                                                                                                                                                                                                                                                                                                                                                                                                                                                                                                                                                                                             |
| Validation of the Italian Young Carer of Parents Inventory-Revised (YCOPI-R) (Landi et al., 2020)                                          | Cross sectional youth aged 11–24 (386 young carers and 388 young non-carers)                                                                                                                          | The Italian YCOPI-R is a psychometrically sound measure of caregiving experiences in Italian youth. Findings confirm the multidimensional nature of youth caregiving, the mix of costs and rewards associated with it, and the link between youth caregiving and diverse adjustment outcomes                                                                                                                                                                                                                                                                                                                                                                                                                                                                                                                                                                                                                                                                                                                                                                                        |

| Article's title                                                                                                                          | Method                                                                                                                                                                                                                                                            | Finding                                                                                                                                                                                                                                                                                                                                                                                                                                                                                                                                                                                                                                                         |
|------------------------------------------------------------------------------------------------------------------------------------------|-------------------------------------------------------------------------------------------------------------------------------------------------------------------------------------------------------------------------------------------------------------------|-----------------------------------------------------------------------------------------------------------------------------------------------------------------------------------------------------------------------------------------------------------------------------------------------------------------------------------------------------------------------------------------------------------------------------------------------------------------------------------------------------------------------------------------------------------------------------------------------------------------------------------------------------------------|
| Sleep Quality in Young Adult Informal Caregivers: Understanding Psychological and Biological Processes (Hoyt et al., 2021)               | 76 participants                                                                                                                                                                                                                                                   | The majority of caregiving was for a parent, grandparent, or sibling, involved 10–29 h of care per week, and was to care for a physically ill or disabled loved one.<br>The majority of caregivers reported a “high” level of caregiver burden. caregivers reported significantly more sleep disturbance and greater sleep latency in the prior 30-day period. Taken together, the physical and emotional demands associated with caregiving contribute to and may exacerbate sleep problems and dysregulation in stress processes among young informal caregivers. Studies of caregivers should, however, not assume that caregiving is universally burdensome |
| Combined Effects of Mother's, Father's and Teacher's Psychological Distress on Schoolchildren's Mental Health Symptoms (Li et al., 2021) | A cross-sectional survey was conducted among 8488 Chinese schoolchildren aged 6– 17 years in northeast China.<br>The Strengths and Difficulties Questionnaire (SDQ) and General Health Questionnaire (GHQ) were used to measure the mental health of the students | caretakers have a significant negative influence on schoolchildren's emotional well-being, in the order of mother > father > teacher. It is desirable to assess and manage students' mental health in the both the family and school contexts                                                                                                                                                                                                                                                                                                                                                                                                                   |
| Differences in the Experience of Caregiving Between Spouse and Adult Child Caregivers in Dementia With Lewy Bodies (Rigby et al., 2019)  | cross-sectional analytic study spouses ( $n = 255$ ) and adult children ( $n = 160$ ) caregivers                                                                                                                                                                  | Adult child caregivers were more likely to care for women ( $p < .001$ ) and see the care recipient less often ( $p < .001$ ) reported lower quality of life ( $p < .001$ ) and more caregiver burden ( $p < .009$ ), but also greater social support ( $p < .001$ )                                                                                                                                                                                                                                                                                                                                                                                            |
| Young Carers in Northern Ireland: Perceptions of and Responses to Illness and Disability within the Family (McGibbon et al., 2019)       | a qualitative study undertaken with twenty-two young carers across Northern Ireland aged between eight and eighteen                                                                                                                                               | It was found that knowledge of and response to both the nature and trajectory of illness or disability contributed to young carers' capacity for resilience.<br>unpredictable behaviour<br>or experiencing parental withdrawal from many aspects of daily living. This confirms the fact that the impact of caring is not something that can easily be extricated from myriad experiences, both past and present, that combine to influence the lives of young carers                                                                                                                                                                                           |
| Children with ill parents: extent and nature of caring activities (Kallander, Weimand, Becker, et al., 2018)                             | An explorative cross-sectional multicentre study.                                                                                                                                                                                                                 | A large number of children with ill parents are performing various caring activities, especially with regard to personal care.<br>Factors significantly associated with the extent and nature of caring activities were as follows: better social skills and higher external locus of                                                                                                                                                                                                                                                                                                                                                                           |

| Article's title                                                                                                                                                   | Method                                                                                                                                                                                                                                                                                                                                    | Finding                                                                                                                                                                                                                                                                                                                                                                                                                                                                                                                                                                                                                                                                                                                                                 |
|-------------------------------------------------------------------------------------------------------------------------------------------------------------------|-------------------------------------------------------------------------------------------------------------------------------------------------------------------------------------------------------------------------------------------------------------------------------------------------------------------------------------------|---------------------------------------------------------------------------------------------------------------------------------------------------------------------------------------------------------------------------------------------------------------------------------------------------------------------------------------------------------------------------------------------------------------------------------------------------------------------------------------------------------------------------------------------------------------------------------------------------------------------------------------------------------------------------------------------------------------------------------------------------------|
|                                                                                                                                                                   |                                                                                                                                                                                                                                                                                                                                           | control among the children; and poorer physical parental health. Parent's access to home-based services was limited                                                                                                                                                                                                                                                                                                                                                                                                                                                                                                                                                                                                                                     |
| Outcomes for children who care for a parent with a severe illness or substance abuse (Kallander, Weimand, Ruud, et al., 2018)                                     | This was a cross-sectional, multicenter study. parents who were out- or inpatients in five public hospitals in Norway as well as their children. The sample included 246 children ages 8–18 and 238 of their parents with a severe physical illness, mental illness, or substance abuse                                                   | Ten percent reported negative outcomes at a clinical level of concern, and nearly half of the children reported stress. Positive and negative outcomes were associated with the nature of caring activities (e.g., personal care, financial and practical management, household management), social skills, and perceived external locus of control                                                                                                                                                                                                                                                                                                                                                                                                     |
| Adults' recollections and perceptions of childhood caregiving to a parent with significant physical disability (Iezzoni et al., 2016)                             | 1-h, semi-structured, open-ended interviews with 20 persons age $\geq 21$ years who as children (age $< 18$ years) had a parent with significant mobility disability. We used conventional content analysis to identify themes.                                                                                                           | As children, most interviewees assisted their disabled parent with activities of daily living (ADLs) and instrumental ADLs; some children provided more medical supports. Interviewees reported both positive and negative childhood attitudes about caregiving. Roughly half recalled as children feeling proud, special, or otherwise positively toward caregiving activities, while about one-third viewed caregiving as just part of their daily reality (i.e., simply needing to be done). Approximately half remembered also feeling resentful, primarily from time demands, insufficient appreciation, and being different from their peers. Interviewees reported gender and cultural factors affecting their caregiving roles and perceptions. |
| Experiences and perspectives of self-compassion from young adult children of parents with mental illness (Dunkley-Smith et al., 2021)                             | A purposive sample of ten Australian emerging adults aged 18–25 years (3 men, 6 women and 1 non-binary person) participated in individual semi-structured telephone interviews. <a href="#">Interpretative Phenomenological Analysis</a> was used to examine and interpret participants' experiences and perspectives of self-compassion. | Four superordinate themes were identified: Learning self-compassion; Functions of self-compassion; Lessons in self-criticism; and Self-compassion for the “kid in the background”. participants in this study described self-compassion as rejection of perceived societal expectations of perpetual self-improvement.                                                                                                                                                                                                                                                                                                                                                                                                                                  |
| Associations between young informal caring and mental health: a prospective observational study using augmented inverse probability weighting (King et al., 2021) | Data was drawn from Waves 5, 6, 8 (2012–2018) of the Longitudinal Study of Australian Children.                                                                                                                                                                                                                                           | ny caring at age 14/15 years was associated with poorer mental health at age 18/19 years compared to those reporting no caring. This highlights the need for support for young informal carers, particularly for those providing more intensive caring.                                                                                                                                                                                                                                                                                                                                                                                                                                                                                                 |

| Article's title                                                                                                                                                                    | Method                                                                                                                                                                                                                                                                       | Finding                                                                                                                                                                                                                                                                                                                                                                                                                                                                                                                                                                                            |
|------------------------------------------------------------------------------------------------------------------------------------------------------------------------------------|------------------------------------------------------------------------------------------------------------------------------------------------------------------------------------------------------------------------------------------------------------------------------|----------------------------------------------------------------------------------------------------------------------------------------------------------------------------------------------------------------------------------------------------------------------------------------------------------------------------------------------------------------------------------------------------------------------------------------------------------------------------------------------------------------------------------------------------------------------------------------------------|
| Children of parents with mental illness in the COVID-19 pandemic: A cross-sectional survey in China (Tianhang et al., 2021)                                                        | 665 COPMI from six sites including Wuhan in China were enrolled. COPMI's mental health and the impacts of COVID-19 were assessed by an online survey.                                                                                                                        | 16.1 % of participants were in abnormal range of mental health, with interpersonal relationship being the most common problem. 48.6 % of participants reported quite worried about the epidemic.<br>Concerns about COVID-19 ( $OR = 1.7$ , $p = 0.02$ ), decreased family income ( $OR = 2.0$ , $p = 0.02$ ), being physically abused ( $OR = 2.1$ , $p = 0.04$ ), witnessing family members being physically abused ( $OR = 2.0$ , $p = 0.03$ ), and needs for promoting family members' mental health ( $OR = 2.2$ , $p < 0.01$ ) were independent risk factors for participants' mental health. |
| Peer connections as an intervention with children of families where a parent has a mental illness: Moving towards an understanding of the processes of change (Grové et al., 2015) | A mixed methods research approach was employed with participants aged between 8 and 12 years old; 69 completed pre- and post-questionnaires and 18 of these same participants engaged in telephone interviews post programme.                                                | education about parental mental health encouraged children to reflect on their parent's mental illness with new insights.<br>The qualitative findings suggest that some children would talk to friends or people outside the family, and others would not.<br>The children who would not seek help post programme reported that they did not feel comfortable sharing information because they were worried about or were scared of being bullied                                                                                                                                                  |
| Mental health resilience in the adolescent offspring of parents with depression: a prospective longitudinal study (Collishaw et al., 2015)                                         | a prospective longitudinal study of offspring of parents with recurrent depression. Parents with recurrent <a href="#">major depressive disorder</a> , co-parents, and offspring (aged 9–17 years at baseline) were assessed three times over 4 years in a community setting | Our findings show that, as a group, offspring of parents with recurrent depression experienced high rates of mental health problems. (20%) of the 262 adolescents showed sustained good mental health.<br>Co-parent emotional support emerged as a particularly strong predictor of mental health resilience in this high-risk sample.                                                                                                                                                                                                                                                             |
